# Supplementary material for: Dynamic Interplay between Social Brain Development and Nutrient Intake in Young Children
Source: MDPI journal article supplement (doi:10.3390/nu15173754), 2023-08-28
Supplement: s1 [file nutrients-2527317-supplementary.pdf › nutrients-2527317-supplementary.pdf]

**Supplementary Table S1.** Inclusion criteria of participants in the study <sup>a</sup>.

|   | Description of inclusion criteria                                                                                          | Condition for inclusion                                                                   |
|---|----------------------------------------------------------------------------------------------------------------------------|-------------------------------------------------------------------------------------------|
| 1 | Full-term singleton pregnancy                                                                                              | >37 weeks                                                                                 |
| 2 | Uncomplicated pregnancy                                                                                                    | i.e., no pre-eclampsia, high pregnancy blood pressure or gestational diabetes, GDM report |
| 3 | Abnormal fetal ultrasound report                                                                                           | No                                                                                        |
| 4 | 5-minute APGAR score for infants                                                                                           | ≥8 points                                                                                 |
| 5 | Birth weight                                                                                                               | >1500 grams                                                                               |
| 6 | History of neurotrauma                                                                                                     | No                                                                                        |
| 7 | Sibling or parental psychiatric history reports, including autism                                                          | No                                                                                        |
| 8 | Mother with Major depressive disorder requiring medication during pregnancy or in the 6 months prior to becoming pregnant. | No                                                                                        |
| 9 | Successful MRI scan with time-matched nutrition intake information using the ASA-24 for at least one 24-hour period.       | Performed within one week of the MRI                                                      |

<sup>a</sup> Abbreviations: GDM: Gestational diabetes mellitus; APGAR: Activity, Pulse, Grimace, Appearance, Respiration; MRI: Magnetic Resonance Imaging
